# Supplementary material for: Attributional style in Borderline personality disorder is associated with self-esteem and loneliness
Source: PubMed Central journal article supplement (PMC11342650; doi:10.1186/s40479-024-00263-2), 2024-08-23

## **Supplementary Material**

### **Attributional style in Borderline Personality Disorder is associated with self-esteem and loneliness**

Schulze, A. <sup>1\*</sup>, Rommelfanger, B. <sup>1</sup>, Schendel, E. <sup>1</sup>, Schott, H. <sup>1</sup>, Lerchl, A. <sup>1</sup>, Vonderlin, R. <sup>2</sup>,  
Lis, S <sup>1,2</sup>.

<sup>1</sup>Department of Clinical Psychology, Central Institute of Mental Health, Medical Faculty  
Mannheim, University of Heidelberg, Germany

<sup>2</sup>Department of Psychosomatic Medicine and Psychotherapy, Central Institute of Mental  
Health, Medical Faculty Mannheim, University of Heidelberg, Germany

**Table S1***Results of the 2x2x3 rm-ANOVA*

| effect                                  | df <sub>1,2</sub> | <i>F</i> | <i>p</i> | $\eta^2_p$ |
|-----------------------------------------|-------------------|----------|----------|------------|
| group                                   | 1, 62             | 10.40    | .002     | .144       |
| attribution dimension                   | 2, 124            | 9.69     | <.001    | .135       |
| attribution dimension * group           | 2, 124            | 9.86     | <.001    | .137       |
| valence                                 | 1, 62             | .05      | .817     | .001       |
| valence * group                         | 1, 62             | 47.81    | <.001    | .435       |
| attribution dimension * valence         | 2, 124            | 27.62    | <.001    | .308       |
| attribution dimension * valence * group | 2, 124            | 3.28     | .042     | .050       |

*Note: p's are reported for Greenhouse-Geisser corrected degrees of freedom***Table S2***Comparison between groups*

| attribution dimension | scenario | <i>t</i> (62) | <i>p</i> | 95% CI |       | effect size<br>Cohen's <i>d</i> |
|-----------------------|----------|---------------|----------|--------|-------|---------------------------------|
| internality           | positive | 6.112         | <.001    | 0.79   | 1.55  | 1.53                            |
|                       | negative | -5.681        | <.001    | -1.53  | -0.74 | -1.42                           |
| stability             | positive | 1.298         | .199     | -0.14  | 0.68  | 0.32                            |
|                       | negative | -6.293        | <.001    | -2.01  | -1.04 | -1.57                           |
| globality             | positive | 1.199         | .235     | -0.21  | 0.84  | 0.30                            |
|                       | negative | -6.689        | <.001    | -2.04  | -1.10 | -1.67                           |

*Note: Bonferroni corrected threshold is  $p < .008$*

# Figure S1

Association between attributional style with duration of loneliness and interpersonal functioning

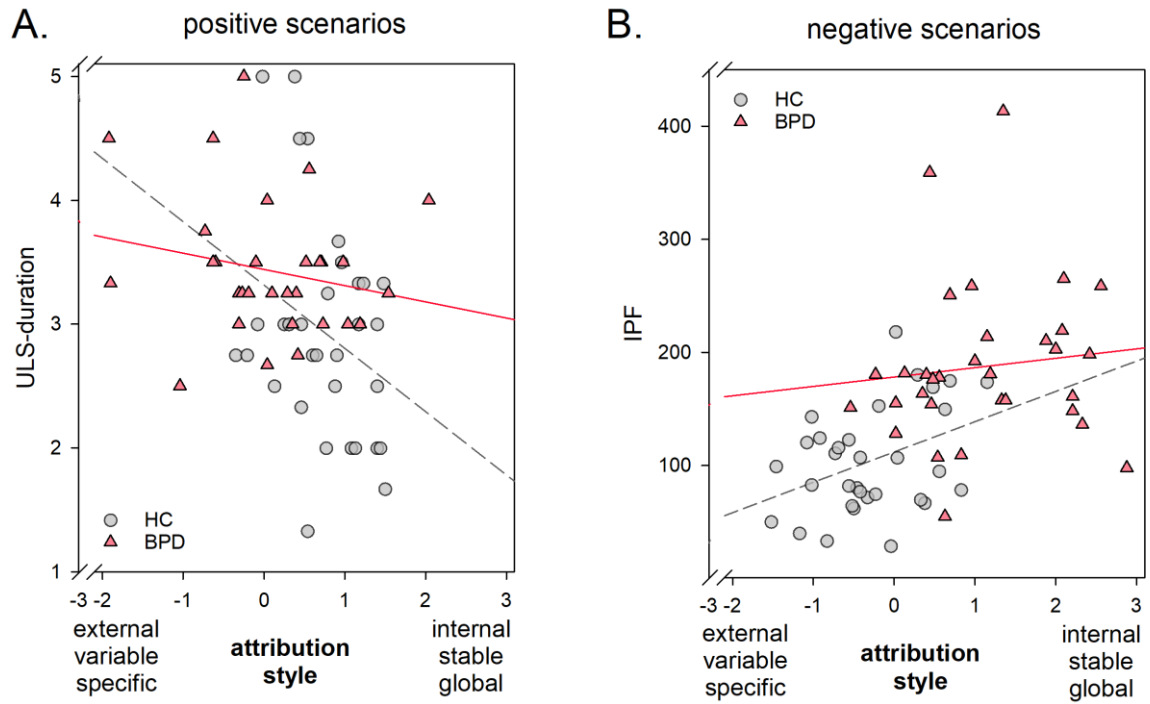

Supplement: 40479_2024_263_MOESM1_ESM.pdf [file 40479_2024_263_MOESM1_ESM.pdf]
